# Supplementary material for: Improvement in the Safety of Rapid Sequence Intubation in the Emergency Department with the Use of an Airway Continuous Quality Improvement Program
Source: PubMed Central journal article supplement (PMC6625676; doi:10.5811/westjem.2019.4.42343), 2019-06-03
Supplement: wjem-20-610-s001.pdf [file wjem-20-610-s001.pdf]

# Emergency Department Airway CQI Form

\_\_\_\_/\_\_\_\_/\_\_\_\_  
Date Form Filled Out

(Patient Sticker)  
Name: \_\_\_\_\_  
MRN: \_\_\_\_\_  
Age: \_\_\_\_\_

Attending: \_\_\_\_\_  
Resident: \_\_\_\_\_ (Specialty: \_\_\_\_\_)  
PGY: I II III IV V Attending

Trauma → Mechanism \_\_\_\_\_  
Injuries \_\_\_\_\_  
 Medical → Diagnosis \_\_\_\_\_

Was there a **FAILED** intubation attempt **PREHOSPITAL**?  Yes  No  
If **YES**, then:  NRB  BVM  LMA  Air-Q  King  Combitube  Cricothyrotomy  Esophageal Intubation

Did the patient **FAIL** BiPAP in the ED?  Yes  NA If **YES**, for how long? \_\_\_\_\_ min

### PREOX - AP OX

**PREOX Device(s):**  None  
 NRB Face Mask:  5L/min  10L/min  15L/min  >15L/min  Flush 70  Other \_\_\_\_\_  
 Nasal Cannula:  5L/min  10L/min  15L/min  >15L/min  Other \_\_\_\_\_  
 BVM (spontaneous):  5L/min  10L/min  15L/min  >15L/min  Flush 70  Other \_\_\_\_\_  
 BVM (assisted):  5L/min  10L/min  15L/min  >15L/min  Flush 70  Other \_\_\_\_\_  
 Optiflow or  Vapotherm:  40L/min  70 L/min  Other \_\_\_\_\_  
 BiPAP: IPAP \_\_\_\_\_ cm / EPAP \_\_\_\_\_ cm

**PREOX Position:**  Supine  
 Upright:  30 degrees  45 degrees  60 degrees  90 degrees

**PREOX Duration:**  1 min  2 min  3 min  4 min  5 min  >5 min  Estimated or  Timed

**PREOX Efficacy:** **BEFORE** PREOX: SpO<sub>2</sub> \_\_\_\_\_ %  
**AFTER** PREOX: SpO<sub>2</sub> \_\_\_\_\_ %  ETO<sub>2</sub> Measured ETO<sub>2</sub> Achieved \_\_\_\_\_ %

**AP OX Device:**  None  
 Nasal Cannula:  5L/min  10L/min  15L/min  >15L/min  Other \_\_\_\_\_  
 Optiflow or  Vapotherm:  40L/min  70 L/min  Other \_\_\_\_\_

| Reason for Intubation (check <u>ONE</u> ):                               | Intubation Technique                                                                          | Intubation Drugs Used                                                 |
|--------------------------------------------------------------------------|-----------------------------------------------------------------------------------------------|-----------------------------------------------------------------------|
| <input type="radio"/> Airway Protection                                  | <input type="radio"/> RSI Cricoid Pressure: <input type="radio"/> Y <input type="radio"/> N   | <input type="radio"/> Succinylcholine <input type="radio"/> Etomidate |
| <input type="radio"/> Hypoxemic (Type I) Resp Failure                    | <input type="radio"/> DSI                                                                     | <input type="radio"/> Rocuronium <input type="radio"/> Ketamine       |
| <input type="radio"/> Hypercarbic (Type II) Resp Failure                 | <input type="radio"/> Sedation Only ( <input type="radio"/> light <input type="radio"/> deep) | <input type="radio"/> Atropine <input type="radio"/> Propofol         |
| <input type="radio"/> Patient Control                                    | <input type="radio"/> Arrest/Near Arrest, <b>NO MEDS</b>                                      | <input type="radio"/> Lidocaine                                       |
| <input type="radio"/> Shock                                              | <input type="radio"/> CRIC                                                                    | <input type="radio"/> Other _____                                     |
| <input type="radio"/> Cardiac Arrest ( <input type="radio"/> Active CPR) | <input type="radio"/> Sed/No Meds <input type="radio"/> Switch to RSI                         | <input type="radio"/> None                                            |

### Difficult Airway Factors

**A. Difficult Situational Factors** (check ALL that apply):  
 Patient Uncooperative  Right Equipment Not Available  Other \_\_\_\_\_  None

**B. Difficult Laryngoscopy/Intubation Factors** (check ALL that apply):  
 Cervical Collar or Immobility  Small Mandible  Short Neck  Blood in Airway  
 Facial/Neck Trauma  Obesity  Restricted Mouth Opening  Vomit in Airway  
 Airway Edema  Large Tongue  Other \_\_\_\_\_  None

**C. Difficult Physiologic Factors** (check ALL that apply):  
**SEVERE:**  Hypoxemia  Hemodynamic Instability  Metabolic Acidosis  RV Failure  Other \_\_\_\_\_  None

**D. Difficult Ventilation Factors** (Face Mask & Supraglottic Device) (check ALL that apply):  
 Beard  Poor Mask Seal  Obesity  Age >55  No Teeth  
 Stiff Lungs  Restricted Mouth Opening  Sleep Apnea  Disrupted Airway Anatomy  Other \_\_\_\_\_  None

**E. Difficult Surgical Airway Factors** (check ALL that apply):  
 Neck Surgery/Mass/Radiation  Obesity  Limited Neck Access  Distorted Laryngeal Anatomy  Other \_\_\_\_\_  None

### Pre-Intubation Difficult Airway Assessment

|                                                                                                                                |                                                                                                                                    |
|--------------------------------------------------------------------------------------------------------------------------------|------------------------------------------------------------------------------------------------------------------------------------|
| <b>A. Situational Difficulty:</b> <input type="radio"/> Easy <input type="radio"/> Challenging <input type="radio"/> Difficult | <b>D. Ventilation Difficulty:</b> <input type="radio"/> Easy <input type="radio"/> Challenging <input type="radio"/> Difficult     |
| <b>B. Intubation Difficulty:</b> <input type="radio"/> Easy <input type="radio"/> Challenging <input type="radio"/> Difficult  | <b>E. Surgical Airway Difficulty:</b> <input type="radio"/> Easy <input type="radio"/> Challenging <input type="radio"/> Difficult |
| <b>C. Physiologic Difficulty:</b> <input type="radio"/> Easy <input type="radio"/> Challenging <input type="radio"/> Difficult | <b>OVERALL DIFFICULTY:</b> <input type="radio"/> Easy <input type="radio"/> Challenging <input type="radio"/> Difficult            |

Over 

**Outcome**

← Lowest SpO<sub>2</sub> **DURING** Intubation: \_\_\_\_\_ % →

**Attempt #1**

Operator: \_\_\_\_\_  
Device: \_\_\_\_\_  
Blade Type/Size: \_\_\_\_\_  
Stylet:  Standard  GlideRite  None  
Bougie:  Yes  No ( Rescue/ Education)

**Outcome** (check **ONE**):

- SUCCESS**
- FAILED**
  - Reason for Failure:**
  - Esophageal Intubation
  - Can't See Cords
  - Can't Direct Tube
  - Tube Wouldn't Pass
  - Equipment Failure

**Adverse Events:**

- NONE**
- Desaturation (<90%)
- Hypotension (<90mm)
- Aspiration
- Dysrhythmia
- Dental Injury
- Laryngospasm
- Cuff Leak
- Extubation
- Mainstem
- Pneumothorax
- Cardiac Arrest
- Other \_\_\_\_\_

**Attempt #2**

Operator: \_\_\_\_\_  
Device: \_\_\_\_\_  
Blade Type/Size: \_\_\_\_\_  
Stylet:  Standard  GlideRite  None  
Bougie:  Yes  No ( Rescue/ Education)

**Outcome** (check **ONE**):

- SUCCESS**
- FAILED**
  - Reason for Failure:**
  - Esophageal Intubation
  - Can't See Cords
  - Can't Direct Tube
  - Tube Wouldn't Pass
  - Equipment Failure

**Adverse Events:**

- NONE**
- Desaturation (<90%)
- Hypotension (<90mm)
- Aspiration
- Dysrhythmia
- Dental Injury
- Laryngospasm
- Cuff Leak
- Extubation
- Mainstem
- Pneumothorax
- Cardiac Arrest
- Other \_\_\_\_\_

\*If more than 2 attempts use an additional form(s)

**Cormack-Lehane Grade of Laryngoscopic View**

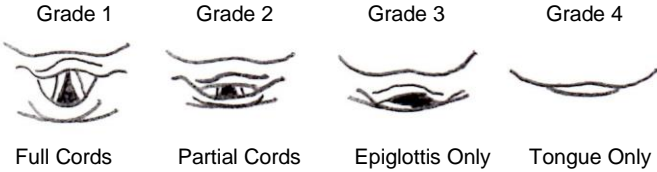

|                            |       |       |       |                                                           |
|----------------------------|-------|-------|-------|-----------------------------------------------------------|
| DL View (Attempt #): _____ | _____ | _____ | _____ | ELM Used? <input type="radio"/> Y <input type="radio"/> N |
| VL View (Attempt #): _____ | _____ | _____ | _____ |                                                           |

|                                                                                                     |                                                                                                     |                                                                          |
|-----------------------------------------------------------------------------------------------------|-----------------------------------------------------------------------------------------------------|--------------------------------------------------------------------------|
| <b>Tube Delivery Score</b><br><small>(DIRECTING the tube to the glottis)</small>                    | <b>Tube Advancement Score</b><br><small>(ADVANCING the tube down the trachea)</small>               | <b>Stylet Withdrawal?</b><br><small>(to FACILITATE tube passage)</small> |
| <input type="radio"/> I <input type="radio"/> II <input type="radio"/> III <input type="radio"/> IV | <input type="radio"/> I <input type="radio"/> II <input type="radio"/> III <input type="radio"/> IV | <input type="radio"/> Yes <input type="radio"/> No                       |
| Very Easy    Somewhat Difficult    Moderately Difficult    Extremely Difficult                      | Very Easy    Somewhat Difficult    Moderately Difficult    Extremely Difficult                      |                                                                          |

**Video Laryngoscopy Section**

If using Standard Geometry VL blade (C-MAC MacMiller, GlideScope-MAC or McGrath-MAC):

**Used as DL Only**     **Used as VL Only**     **DL to VL Switch**     **VL to DL Switch**

Attempt# \_\_\_\_\_    Attempt# \_\_\_\_\_    Attempt# \_\_\_\_\_    Attempt# \_\_\_\_\_

|                                                                                                                                                                                                                                                                                                                               |                                                                                                                                                                                                                          |
|-------------------------------------------------------------------------------------------------------------------------------------------------------------------------------------------------------------------------------------------------------------------------------------------------------------------------------|--------------------------------------------------------------------------------------------------------------------------------------------------------------------------------------------------------------------------|
| <b>Lens Contamination</b> (secretions, vomit, blood) <ul style="list-style-type: none"><li><input type="radio"/> None</li><li><input type="radio"/> Mild (view minimally obscured)</li><li><input type="radio"/> Moderate (view partially obscured)</li><li><input type="radio"/> Severe (view completely obscured)</li></ul> | <b>Lens Fogging</b> (moisture) <ul style="list-style-type: none"><li><input type="radio"/> None</li><li><input type="radio"/> Mild</li><li><input type="radio"/> Moderate</li><li><input type="radio"/> Severe</li></ul> |
|-------------------------------------------------------------------------------------------------------------------------------------------------------------------------------------------------------------------------------------------------------------------------------------------------------------------------------|--------------------------------------------------------------------------------------------------------------------------------------------------------------------------------------------------------------------------|

**Please provide any important comments regarding the intubation:**

\_\_\_\_\_

\_\_\_\_\_

BMI: \_\_\_\_\_

Weight: \_\_\_\_\_ kg
